# Supplementary material for: Direct multi-element analysis of plastic materials via solid sampling electrothermal vaporization inductively coupled plasma optical emission spectroscopy
Source: Royal Society of Chemistry journal article supplement (doi:10.1039/c4ja00442f), 2015-01-01
Supplement: c4ja00442f1.xlsx [file c4ja00442f1.xlsx]

## Sheet: Tabelle1
	Method 1				Method 2a
ICP-MS	ElementXR				ElementII
	Micro Mist nebulizer 200 µl/min self-priming				PFA micro nebulizer 100 µl/min self-priming
	cyclon spraychamber				cylindric PFA spraychamber
	quartz injector Ø 1 mm				saphir injector Ø 1.5 mm
Resolution	low (R = 300), medium (R = 4000)				medium (R = 4500)
RF Power	1300 W				1250 W
Auxiliary Gas	1 L/min				0.75 L/min
Plasma Gas	15 L/min				16 L/min
Sample gas	0.8 L/min				1 L/min
Add. gas	-				0.075 L/min
Sample mass	60 mg				40 mg
Acid solution	4 ml HNO3				5 ml HNO3 + 1 ml HCl
Microwave system	UltraClave III				Microwave 3000
Temperature program	time	power	temperature	pressure	time	power	temperature	pressure
	[min]	[W]	[°C]	[bar]	[min]	[W]	[°C]	[bar]
	10	1000	20 → 110	150	10	0 → 1400	20 → 120	0 → 40
	10	1000	110	150	40	1400	120 → 220	40 → 80
	10	1000	110 → 160	150
	10	1000	160	150
	20	1000	160 → 250	160
	45	1000	250	160
Isotopes	111Cd(LR), 112Cd (LR, MR), 113Cd (LR), 114Cd (LR, MR),				45Sc (MR), 56Fe (MR)
	63Cu (LR, MR), 65Cu (LR, MR), 52Cr (MR), 53Cr (MR),
	56Fe (MR), 121Sb (LR, MR), 123Sb (LR, MR)
a for determination of Fe2O3 in ABS-Matrices
